# Supplementary material for: Combination of Healthy Lifestyle Factors on the Risk of Hypertension in a Large Cohort of French Adults
Source: Nutrients. 2019 Jul 23;11(7):1687. doi: 10.3390/nu11071687 (PMC6683281; doi:10.3390/nu11071687)
Supplement: Supplementary file 1 [file nutrients-11-01687-s001.pdf]

Figure S1: Flow chart

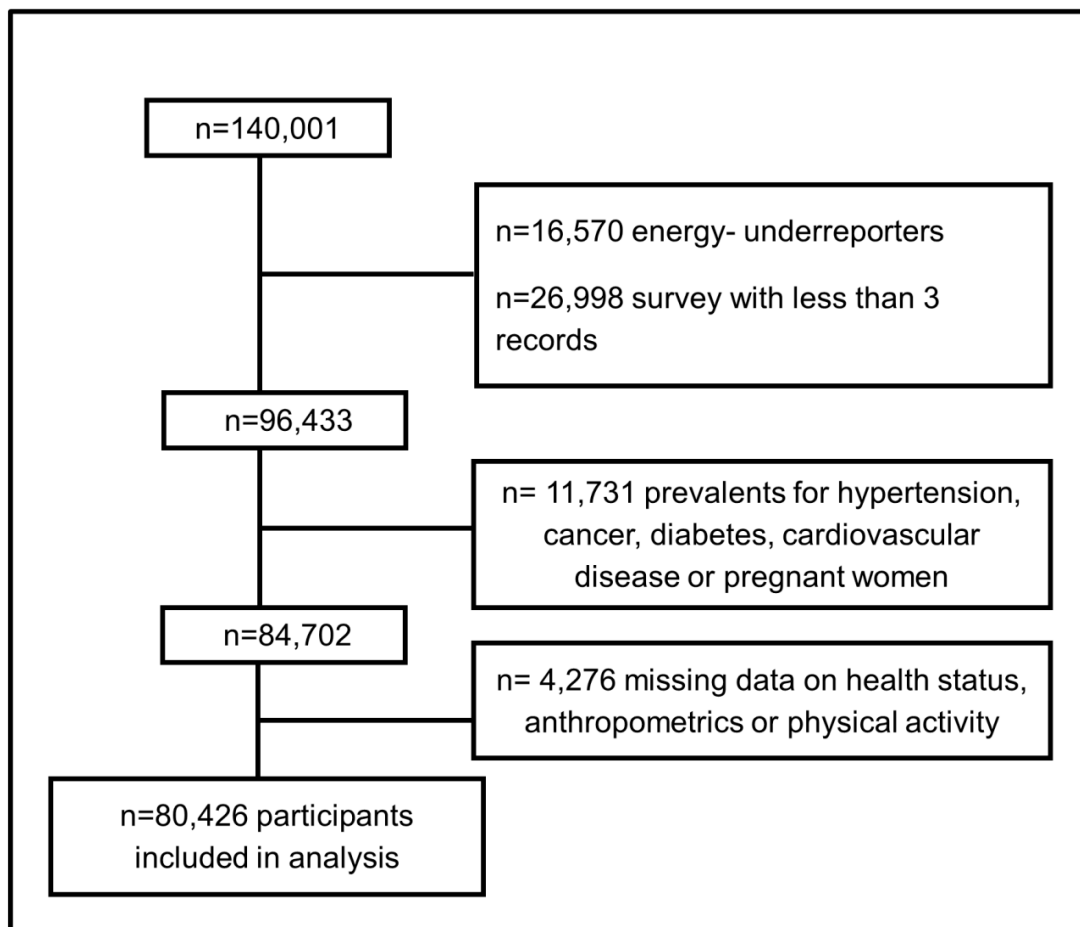

**Table S1:** Hazard ratios of incident hypertension in relation to Healthy Lifestyle Index (HLI).

| HLI                    | Cases number | HR (95%CI) <sup>a</sup> | p-value              |
|------------------------|--------------|-------------------------|----------------------|
| 0 or 1                 | 428          | 1 (ref)                 | <0.0001 <sup>b</sup> |
| 2                      | 889          | 0.76 (0.67-0.85)        |                      |
| 3                      | 810          | 0.47 (0.42-0.53)        |                      |
| 4                      | 286          | 0.35 (0.30-0.41)        |                      |
| Per one point increase | -            | 0.69 (0.66-0.72)        | <0.0001 <sup>b</sup> |
| HLI<4                  | 2127         | 1 (ref)                 | <0.0001 <sup>c</sup> |
| HLI=4                  | 286          | 0.56 (0.49-0.65)        |                      |

<sup>a</sup> adjusted for age (as primary time dependent variable) , sex, educational level, smoking and family history of hypertension

<sup>b</sup> linear trends were tested using HLI as ordinal variable

<sup>c</sup> p-value was calculated using the Wald test.
